# Supplementary material for: EGCG Disrupts the LIN28B/Let-7 Interaction and Reduces Neuroblastoma Aggressiveness
Source: MDPI journal article supplement (doi:10.3390/ijms25094795), 2024-04-27
Supplement: s1 [file s1]

# Supplementary Materials

## EGCG disrupts the LIN28B/Let-7 interaction and reduces neuroblastoma aggressiveness

Simona Cocchi <sup>1</sup>, Valentina Greco <sup>1,†</sup>, Viktoryia Sidarovich <sup>1</sup>, Jacopo Vigna <sup>1,2</sup>, Francesca Broso <sup>1</sup>, Diana Corallo <sup>3</sup>, Jacopo Zasso <sup>1,‡</sup>, Angela Re <sup>1,§</sup>, Emanuele Filiberto Rosatti <sup>1</sup>, Sara Longhi <sup>1</sup>, Andrea Defant <sup>2</sup>, Federico Ladu <sup>4</sup>, Vanna Sanna <sup>5</sup>, Valentina Adami <sup>1</sup>, Vito G. D'Agostino <sup>1</sup>, Mattia Sturlese <sup>6</sup>, Mario Sechi <sup>4</sup>, Sanja Aveic <sup>3</sup>, Ines Mancini <sup>2</sup>, Denise Sighele <sup>1,\*,||</sup> and Alessandro Quattrone <sup>1,\*,||</sup>

<sup>1</sup> Department of Cellular, Computational and Integrative Biology (CIBIO), University of Trento, 38123 Trento, Italy;

<sup>2</sup> Department of Physics, University of Trento, 38123 Trento, Italy;

<sup>3</sup> Istituto di Ricerca Pediatrica Fondazione Città della Speranza, 35127 Padova, Italy;

<sup>4</sup> Department of Medicine, Surgery and Pharmacy, University of Sassari, Sassari 07100, Italy;

<sup>5</sup> Nanomater S.r.l, Alghero 07041, Italy;

<sup>6</sup> Molecular Modeling Section, Department of Pharmaceutical and Pharmacological Sciences, University of Padua, 35127 Padova, Italy;

\* Correspondence: denise.sighele@unitn.it (D.S.); alessandro.quattrone@unitn.it (A.Q.); Tel.: +39-0461-283096 (D.S)

† Current address: UOM Anatomia e Istologia Patologica, Santa Chiara Hospital, APSS, 38123 Trento, Italy

‡ Current address: Human Technopole, 20157 Milan, Italy

§ Current address: Department of Applied Science and Technology, Politecnico di Torino, 10129 Torino, Italy

|| These authors contributed equally to this work.

| <b><u>Contents:</u></b>                                                                                                                                   | <b><u>Page(s):</u></b> |
|-----------------------------------------------------------------------------------------------------------------------------------------------------------|------------------------|
| <b>Figure S1.</b> Purification and Functional binding of rLIN28B to pre-let-7g miRNA by AlphaScreen and REMSA.                                            | <b>S2</b>              |
| <b>Table S1.</b> Compounds selected following the primary and the confirmatory Alpha Screenings.                                                          | <b>S3-4</b>            |
| <b>Figure S2.</b> EGCG stability evaluation by HPLC and assessment of EGCG-NP penetration and effect in NB cells.                                         | <b>S5</b>              |
| <b>Figure S3.</b> Empty-NP treatment only slightly affects NB cell proliferation, and EGCG-NP treatment increases let-7 miRNA levels in SK-N-BE(2) cells. | <b>S6</b>              |
| <b>Table S2.</b> Primer sequences.                                                                                                                        | <b>S7</b>              |
| <b>Table S3.</b> Protein purification: buffers composition.                                                                                               | <b>S7</b>              |

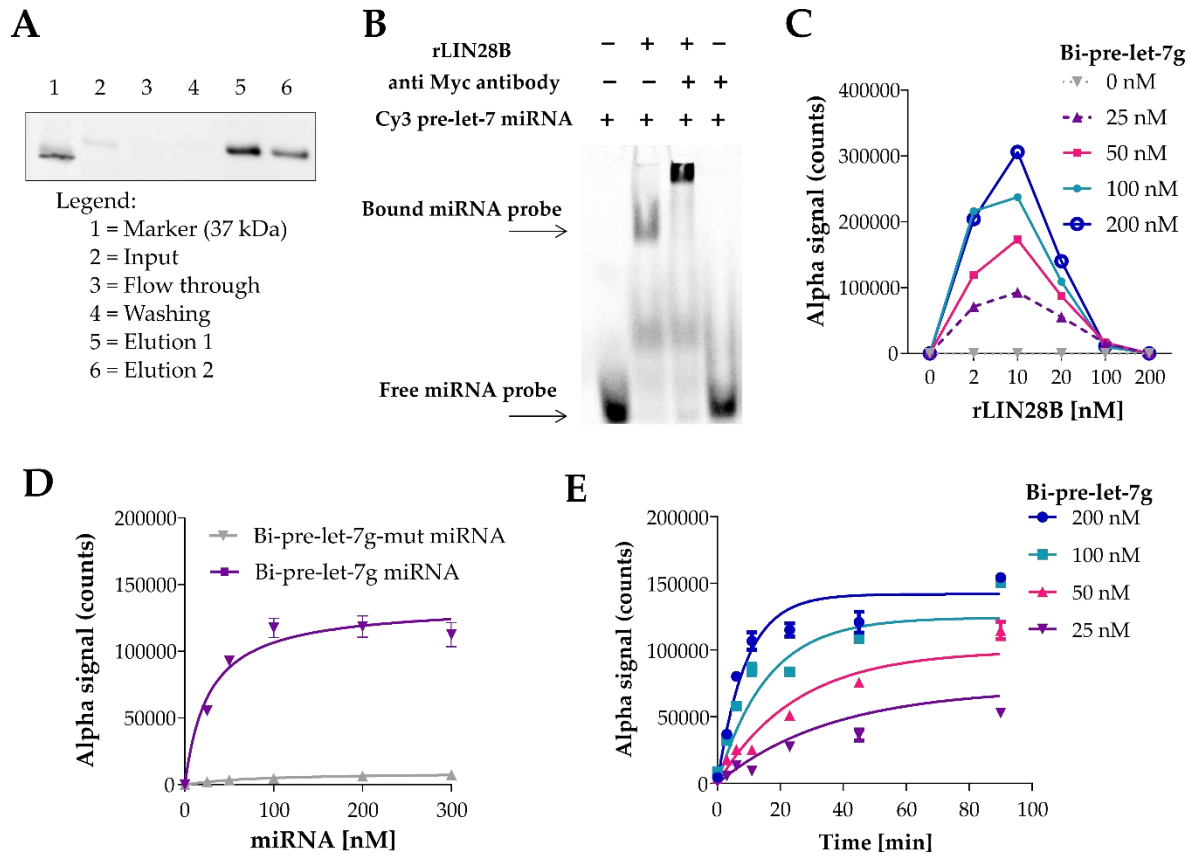

**Figure S1. Purification and functional binding of rLIN28B to pre-let-7g miRNA by AlphaScreen and REMSA.** (A) Immunoblot detection of His6-cMyc-tagged human recombinant LIN28B protein (rLIN28B) produced in HEK293T cells using a monoclonal anti-Myc antibody. (B) Representative REMSA results showing the formation of a rLIN28B/Cy3-labelled-pre-let-7g miRNA complex. The free Cy3-labelled-pre-let-7g miRNA probe alone is detected at lower molecular weights. Anti-Myc antibody addition in the binding reaction produces a complex supershift. (C) rLIN28B titration curves obtained with different concentrations of the biotinylated pre-let-7g miRNA probe performed to identify the 'hook' point of the AlphaScreen assay. (D) Saturation binding experiment to determine the apparent  $K_d$  value for rLIN28B protein/biotinylated pre-let-7g miRNA interaction.  $K_d = 34.7 \pm 3.6$  nM.  $n = 3$  replicates. Mean  $\pm$  SD. (E) The time course of the binding reaction showing that the binding of rLIN28B to the biotinylated pre-let-7g miRNA probe is both time and dose-dependent.  $n = 2$  replicates. Mean  $\pm$  SD.

**Table S1. Compounds selected following the primary and the confirmatory Alpha Screenings.**

| ID   | Compound Name                  | CAS number                                    | Formula                                                                                          | Mol. Wt. | CANONICAL SMILES                                                                                                                                                                                                                                                             |
|------|--------------------------------|-----------------------------------------------|--------------------------------------------------------------------------------------------------|----------|------------------------------------------------------------------------------------------------------------------------------------------------------------------------------------------------------------------------------------------------------------------------------|
| EGCG | epigallocatechin-3-monogallate | 989-51-5                                      | C <sub>22</sub> H <sub>18</sub> O <sub>11</sub>                                                  | 458.38   | <chem>C1C(C(OC2=CC(=CC(=C21)O)O)C3=CC(=C(C(=C3)O)O)O)OC(=O)C4=CC(=C(C(=C4)O)O)O</chem>                                                                                                                                                                                       |
| TFMG | theaflavin monogallates        | 30462-34-1 [3-isomer], 28543-07-9 [3'-isomer] | C <sub>36</sub> H <sub>28</sub> O <sub>16</sub>                                                  | 716.61   | <chem>C1C(C(OC2=CC(=CC(=C21)O)O)C3=CC(=C(C4=C(C(=O)C=C(C(=C34)C5C(CC6=C(C(=C(C(=C6O5)O)O)OC(=O)C7=CC(=C(C(=C7)O)O)O)O)O)O)O</chem>                                                                                                                                           |
| GA   | gallic acid                    | 149-91-7                                      | C <sub>7</sub> H <sub>6</sub> O <sub>5</sub>                                                     | 170.12   | <chem>C1=C(C=C(C(=C1O)O)O)C(=O)O</chem>                                                                                                                                                                                                                                      |
| ATA  | aurin tricarboxylic acid       | 4431-00-9                                     | C <sub>22</sub> H <sub>14</sub> O <sub>9</sub>                                                   | 422.35   | <chem>C1=CC(=C(C=C1C(=C2C=C(C(=O)C(=C2)C(=O)O)C3=C(C(=C(C(=C3)O)C(=O)O)C(=O)O)O</chem>                                                                                                                                                                                       |
| 1    | terbutaline hemisulfate        | 23031-32-5                                    | C <sub>12</sub> H <sub>21</sub> NO <sub>7</sub> S                                                | 323.37   | <chem>CC(C)(C)NCC(C1=CC(=CC(=C1)O)O)O.CC(C)(C)NCC(C1=CC(=CC(=C1)O)O)O.OS(=O)(=O)O</chem>                                                                                                                                                                                     |
| 2    | thioguanine                    | 154-42-7                                      | C <sub>5</sub> H <sub>5</sub> N <sub>5</sub> S                                                   | 167.19   | <chem>C1=NC2=C(N1)C(=S)N=C(N2)N</chem>                                                                                                                                                                                                                                       |
| 3    | thioridazine hydrochloride     | 130-61-0                                      | C <sub>21</sub> H <sub>27</sub> ClN <sub>2</sub> S <sub>2</sub>                                  | 407.04   | <chem>CN1CCCCC1CCN2C3=CC=CC=C3SC4=C2C=C(C(=C4)SC.Cl</chem>                                                                                                                                                                                                                   |
| 4    | suramin hexasodium salt        | 129-46-4                                      | C <sub>51</sub> H <sub>34</sub> N <sub>6</sub> Na <sub>6</sub> O <sub>23</sub><br>S <sub>6</sub> | 1429.19  | <chem>CC1=C(C=C(C(=C1)C(=O)N)C2=C3C(=CC(=CC3=C(C=C2)S(=O)(=O)[O-])S(=O)(=O)[O-])S(=O)(=O)[O-])NC(=O)C4=CC(=CC=C4)NC(=O)NC5=CC=CC(=C5)C(=O)NC6=C(C=CC(=C6)C(=O)NC7=C8C(=CC(=CC8=C(C=C7)S(=O)(=O)[O-])S(=O)(=O)[O-])S(=O)(=O)[O-])C.[Na+].[Na+].[Na+].[Na+].[Na+].[Na+]</chem> |
| 5    | diflubenzuron                  | 35367-38-5                                    | C <sub>14</sub> H <sub>9</sub> ClF <sub>2</sub> N <sub>2</sub> O <sub>2</sub>                    | 310.69   | <chem>C1=CC(=C(C(=C1)F)C(=O)NC(=O)NC2=CC=C(C(=C2)Cl)F</chem>                                                                                                                                                                                                                 |
| 6    | N-hydroxymethylnicotinamide    | 3569-99-1                                     | C <sub>7</sub> H <sub>8</sub> N <sub>2</sub> O <sub>2</sub>                                      | 152.15   | <chem>C1=CC(=CN=C1)C(=O)NC=O</chem>                                                                                                                                                                                                                                          |
| 7    | salicylanilide                 | 87-17-2                                       | C <sub>13</sub> H <sub>11</sub> NO <sub>2</sub>                                                  | 213.24   | <chem>C1=CC=C(C(=C1)NC(=O)C2=CC=CC=C2O</chem>                                                                                                                                                                                                                                |
| 8    | dibutyl phthalate              | 84-74-2                                       | C <sub>16</sub> H <sub>22</sub> O <sub>4</sub>                                                   | 278.35   | <chem>CCCCOC(=O)C1=CC=CC=C1C(=O)OCCCC</chem>                                                                                                                                                                                                                                 |
| 9    | aminosalicylate sodium         | 6018-19-5                                     | C <sub>7</sub> H <sub>6</sub> NNaO <sub>3</sub>                                                  | 175.12   | <chem>C1=CC(=C(C(=C1N)O)C(=O)[O-]).O.O.[Na+]</chem>                                                                                                                                                                                                                          |

|    |                                     |                     |                                                                               |        |                                                                                                                                                          |
|----|-------------------------------------|---------------------|-------------------------------------------------------------------------------|--------|----------------------------------------------------------------------------------------------------------------------------------------------------------|
| 10 | amoxicillin                         | 26787-78-0          | C <sub>16</sub> H <sub>19</sub> N <sub>3</sub> O <sub>5</sub> S               | 365.41 | <chem>CC1(C(N2C(S1)C(C2=O)N<br/>C(=O)C(C3=CC=C(C=C3)O)<br/>N)C(=O)O)C</chem>                                                                             |
| 11 | amphotericin B                      | 1397-89-3           | C <sub>47</sub> H <sub>73</sub> NO <sub>17</sub>                              | 924.10 | <chem>CC1C=CC=CC=CC=CC=CC<br/>=CC=CC(CC2C(C(CC(O2)(<br/>CC(CC(C(CCC(CC(CC(=O)<br/>OC(C(C1O)C)C)O)O)O)<br/>O)O)O)C(=O)O)OC3C(C(C(<br/>C(O3)C)O)N)O</chem> |
| 12 | anthralin                           | 480-22-8, 1143-38-0 | C <sub>14</sub> H <sub>10</sub> O <sub>3</sub>                                | 226.23 | <chem>C1C2=C(C(=CC=C2)O)C(=O<br/>)C3=C1C=CC=C3O</chem>                                                                                                   |
| 13 | chloramphenicol                     | 530-43-8            | C <sub>27</sub> H <sub>42</sub> Cl <sub>2</sub> N <sub>2</sub> O <sub>6</sub> | 561.55 | <chem>CCCCCCCCCCCCCCCCC(=<br/>O)OCC(C(C1=CC=C(C=C1)<br/>[N+])(=O)[O-<br/>])O)NC(=O)C(Cl)Cl</chem>                                                        |
| 14 | chlorcyclizine hydrochloride        | 1620-21-9           | C <sub>18</sub> H <sub>22</sub> Cl <sub>2</sub> N <sub>2</sub>                | 337.30 | <chem>CN1CCN(CC1)C(C2=CC=C<br/>C=C2)C3=CC=C(C=C3)Cl.C<br/>l</chem>                                                                                       |
| 15 | dapsone                             | 80-08-0             | C <sub>12</sub> H <sub>12</sub> N <sub>2</sub> O <sub>2</sub> S               | 248.31 | <chem>C1=CC(=CC=C1N)S(=O)(=O<br/>)C2=CC=C(C=C2)N</chem>                                                                                                  |
| 16 | ethionamide                         | 536-33-4            | C <sub>8</sub> H <sub>10</sub> N <sub>2</sub> S                               | 166.25 | <chem>CCC1=NC=CC(=C1)C(=S)N</chem>                                                                                                                       |
| 17 | telenzepine hydrochloride           | 80880-90-6          | C <sub>19</sub> H <sub>23</sub> ClN <sub>4</sub> O <sub>2</sub> S             | 406.94 | <chem>CC1=C2C(=CS1)C(=O)NC3<br/>=CC=CC=C3N2C(=O)CN4C<br/>CN(CC4)C</chem>                                                                                 |
| 18 | medroxyprogesterone acetate         | 71-58-9             | C <sub>24</sub> H <sub>34</sub> O <sub>4</sub>                                | 386.54 | <chem>CC1CC2C(CCC3(C2CCC3(<br/>C(=O)C)OC(=O)C)C)C4(C1<br/>=CC(=O)CC4)C</chem>                                                                            |
| 19 | piperazine                          | 110-85-0            | C <sub>4</sub> H <sub>10</sub> N <sub>2</sub>                                 | 86.14  | <chem>C1CNCCN1</chem>                                                                                                                                    |
| 20 | procaine hydrochloride              | 51-05-8             | C <sub>13</sub> H <sub>21</sub> ClN <sub>2</sub> O <sub>2</sub>               | 272.78 | <chem>CCN(CC)CCOC(=O)C1=CC<br/>=C(C=C1)N.Cl</chem>                                                                                                       |
| 21 | acedapsone                          | 77-46-3             | C <sub>16</sub> H <sub>16</sub> N <sub>2</sub> O <sub>4</sub> S               | 332.38 | <chem>CC(=O)NC1=CC=C(C=C1)S<br/>(=O)(=O)C2=CC=C(C=C2)N<br/>C(=O)C</chem>                                                                                 |
| 22 | doxorubicin                         | 23214-92-8          | C <sub>27</sub> H <sub>29</sub> NO <sub>11</sub>                              | 543.53 | <chem>CC1C(C(CC(O1)OC2CC(C<br/>C3=C2C(=C4C(=C3O)C(=O)<br/>C5=C(C4=O)C(=CC=C5)OC)<br/>O)(C(=O)CO)O)N)O</chem>                                             |
| 23 | dehydro (11,12)ursolic acid lactone |                     | C <sub>30</sub> H <sub>46</sub> O <sub>3</sub>                                | 454.70 | <chem>CC1CCC23CCC4(C5(CCC6<br/>C(C)(C(CCC6(C5C=CC4(C3<br/>C1C)OC2=O)C)O)C)C</chem>                                                                       |
| 24 | coralyne chloride                   | 38989-38-7          | C <sub>22</sub> H <sub>22</sub> ClNO <sub>4</sub>                             | 399.88 | <chem>CC1=C2C=C(C(=CC2=CC3=<br/>[N+]1C=CC4=CC(=C(C=C43<br/>)OC)OC)OC)OC.[Cl-]</chem>                                                                     |
| 25 | 2',5'-dihydroxy-4-methoxychalcone   | 6342-92-3           | C <sub>18</sub> H <sub>18</sub> O <sub>6</sub>                                | 330.34 | <chem>COC1=CC=C(C=C1)C=CC(=<br/>O)C2=C(C=CC(=C2)O)O</chem>                                                                                               |

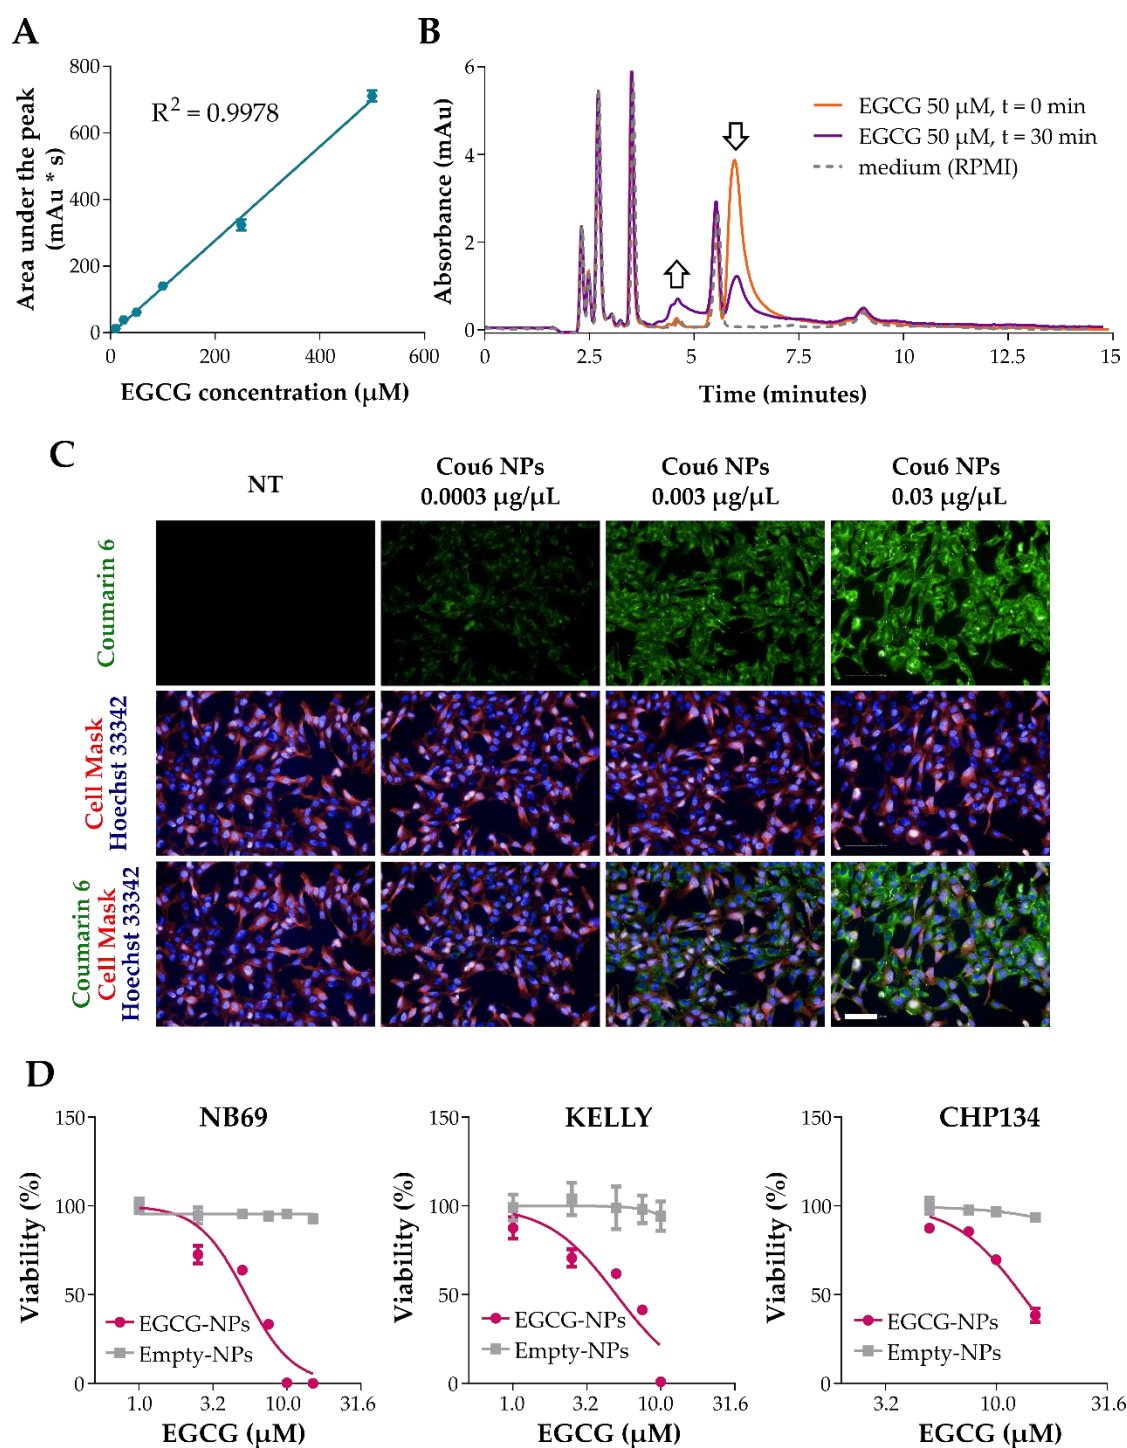

**Figure S2. EGCG stability evaluation by HPLC and assessment of EGCG-NP penetration and effect in NB cells.** (A) EGCG calibration curve. A series of EGCG solutions with different known concentrations (10  $\mu\text{M}$ , 25  $\mu\text{M}$ , 50  $\mu\text{M}$ , 100  $\mu\text{M}$ , 250  $\mu\text{M}$ , 500  $\mu\text{M}$ ) was injected in an Agilent 1200 High HPLC system. A Phenomenex Gemini 5  $\mu\text{m}$  C18 110  $\text{\AA}$  column was used in isocratic conditions with 80:20 water:acetonitrile with 0.01% TFA (pH 4-4.5). The flow rate and the detection were set at 1  $\text{mL}\cdot\text{min}^{-1}$ , and at 280 nm, respectively.  $n = 3$  replicates, mean  $\pm$  SD.  $R^2 = 0.9978$ . (B) Representative HPLC chromatogram of EGCG (50  $\mu\text{M}$ ) in RPMI-1640 at  $t = 0$  and 30 minutes. EGCG retention time is 5.9-6.0 min. The chromatogram of the EGCG solution injected at  $t = 0$  min is depicted in orange, whereas that of the EGCG solution at  $t = 30$  min is depicted in purple. Cell culture medium (RPMI-1640) signals remain constant over time (grey). Arrows indicate EGCG instability in aqueous media

and the formation of degradation products.  $n = 3$  replicates. (C) Representative immunofluorescence images of NB69 cells treated with different amounts of Cou6-NPs (green). Nuclei were stained with Hoechst 33342 (blue) and the cytoplasm with the CellMask™ Deep Red Stain (red). Images were acquired using the Operetta-High Content Imaging System. Scale bar = 100  $\mu\text{m}$ . (D) Representative dose-response curves for EGCG-NPs and empty-NPs on three NB cell lines (NB69, KELLY, CHP134). After 48 h of treatment, cell viability was measured using the CellTiter-Glo® Luminescent Cell Viability Assay. Data are expressed as the percentage of viability normalized on non-treated cells. The graph shows one representative result of  $n = 3$  biological replicates,  $n = 3$  technical replicates each.

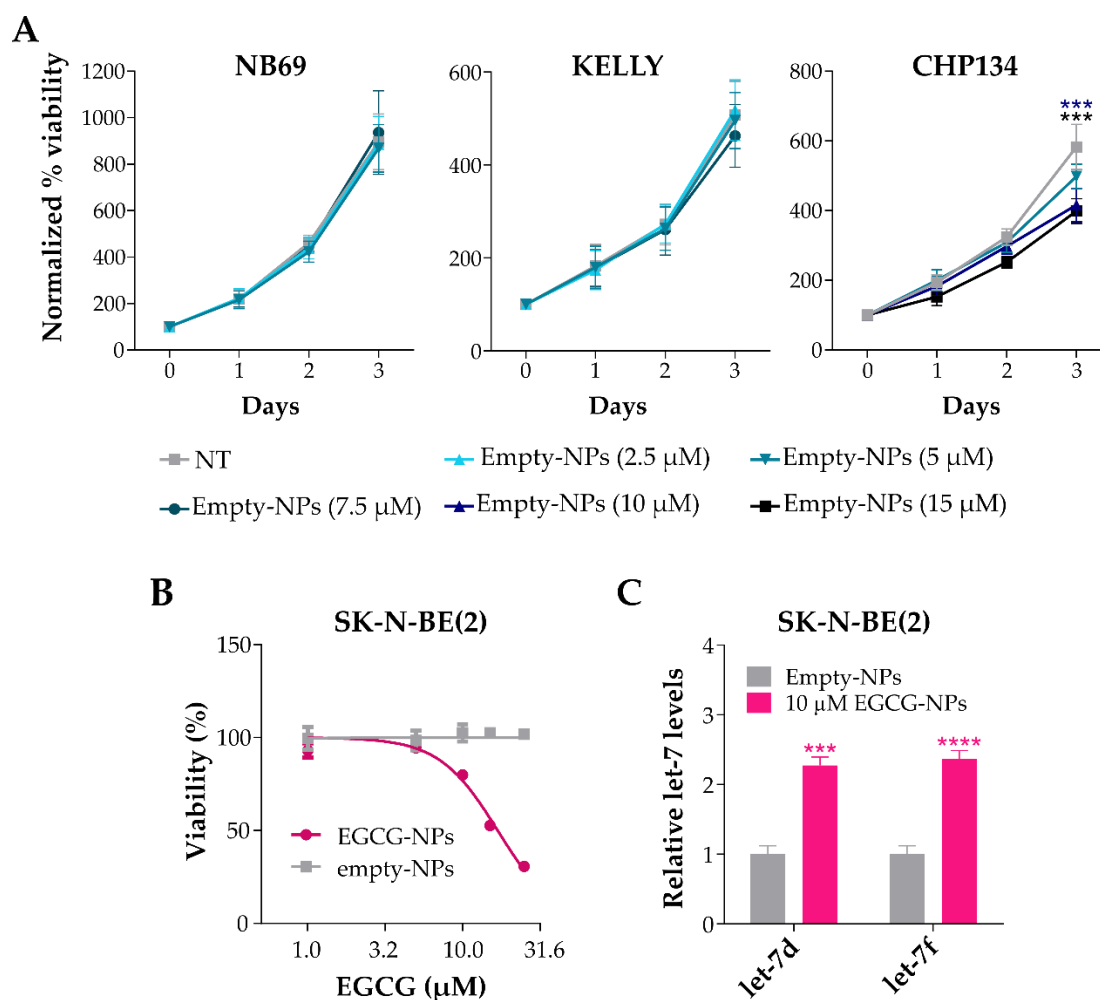

**Figure S3. Empty-NP treatment only slightly affects NB cell proliferation, and EGCG-NP treatment increases let-7 miRNA levels in SK-N-BE(2) cells.** (A) Proliferation curves of NB69, KELLY and CHP134 cells treated with several doses of empty-NPs corresponding to the doses of EGCG-NPs used in Figure 5B. Cell viability was measured using the CellTiter-Glo® Luminescent Cell Viability Assay and normalized on the day of the treatment (day 0). NT = non-treated cells.  $n = 3$  biological replicates,  $n = 3$  technical replicates each. Mean  $\pm$  SEM. Two-way ANOVA followed by Fisher's LSD test (\*\* $p < 0.001$ ). (B) Representative dose-response curves for EGCG-NPs and empty-NPs in SK-N-BE(2) cell line. After 48 h of treatment, cell viability was measured using the CellTiter-Glo® Luminescent Cell Viability Assay. Data are expressed as the percentage of viability normalized on non-treated cells. A representative result is shown,  $n = 2$  biological replicates,  $n = 3$  technical replicates each. Mean  $\pm$  SD. (C) qPCR analysis of let-7-f and let-7-d miRNAs levels in SK-N-BE(2) cells treated with empty-NPs or EGCG-NPs. Expression level is shown as fold change relative to empty-NPs, data were normalised on U6 internal reference gene.  $n = 3$  technical replicates. Mean  $\pm$  SD. Unpaired two-tailed t-test analysis (\*\* $p < 0.001$ , \*\*\*\*  $p < 0.0001$ ).

**Table S2. Primer sequences**

| Gene   | Forward                        | Reverse                       |
|--------|--------------------------------|-------------------------------|
| LIN28B | 5' GAGTCAATACGGGTAACAGGAC 3'   | 5'CACCACAGTTGTAGCATCTATCT 3'  |
| SOX2   | 5' GTATCAGGAGTTGTCAAGGCAGAG 3' | 5' CTAGTCTTAAAGAGGCAGCAAAC 3' |
| SOX9   | 5' GTACCCGCACTTGCACAAC 3'      | 5' TCTCGCTCTCGTTCAGAAAGTC 3'  |
| GAP43  | 5' GGCCGCAACCAAAATTCAGG 3'     | 5'CGGCAGTAGTGGTGCCTTC 3'      |
| TUBB3  | 5' TCAGCGTCTACTACAACGAGGC 3'   | 5' GCCTGAAGAGATGTCCAAAGGC 3'  |
| NESTIN | 5' CCTCAAGATGTCCCTCAGCC 3'     | 5' TCCAGCTTGGGGTCCTGAAA 3'    |
| MYCN   | 5' CCGGGCATGATCTGCAA 3'        | 5' CCGCCGAAGTAGAAGTCATCTT 3'  |
| TH     | 5' TCATCACCTGGTCACCAAGTT 3'    | 5' GGTGCGCGTGCCTGTACT 3'      |
| HPRT1  | 5' TGACACTGGCAAACAATGCA 3'     | 5' GGTCTTTTACCAGCAAGCT 3'     |
| SDHA   | 5' TGGGAACAAGAGGGCATCTG 3'     | 5' CCACCACTGCATCAAATTCATG 3'  |

**Table S3. Protein purification: buffers composition.**

| Buffer Name                      | Composition                                                                                                                                              |
|----------------------------------|----------------------------------------------------------------------------------------------------------------------------------------------------------|
| <b>Equilibration buffer (EQ)</b> | 25 mM Tris-Cl pH 8; 100 mM NaCl; 0.05% NP-40; 1 mM DTT; 3 mM MgCl <sub>2</sub> ; 10 mM imidazole; Protease inhibitors (diluted 1:100)                    |
| <b>Wash1 (W1)</b>                | 25 mM Tris-Cl pH 8; 200 mM NaCl; 0.05% NP-40; 1 mM DTT; 3 mM MgCl <sub>2</sub> ; 50 mM imidazole.                                                        |
| <b>Wash2 (W2)</b>                | 25 mM Tris-Cl pH 8; 300 mM NaCl; 0.05% NP-40; 1 mM DTT; 3 mM MgCl <sub>2</sub> ; 50 mM imidazole                                                         |
| <b>Wash3 (W3)</b>                | 25 mM Tris-Cl pH 8; 300 mM NaCl; 0.05% NP-40; 1 mM DTT; 3 mM; MgCl <sub>2</sub> ; 70 mM imidazole                                                        |
| <b>Wash4 (W4)</b>                | 25 mM Tris-Cl pH 7; 500 mM NaCl; 0.05% NP-40; 1 mM DTT; 3 mM MgCl <sub>2</sub> ; 70 mM Imidazole                                                         |
| <b>Elution buffer (EL)</b>       | 25 mM Tris-Cl pH 8; 250 mM NaCl; 3 mM MgCl <sub>2</sub> ; 400 mM imidazole                                                                               |
| <b>Dialysis buffer</b>           | 25 mM HEPES pH 7.4; 110 mM KCl; 10Mm NaCl; 1 mM MgCl <sub>2</sub> ; 15 µM ZnCl <sub>2</sub> ; 0.02% Tween; 0.1 % p/v ultrapure BSA                       |
| <b>Storage buffer (S)</b>        | 25 mM HEPES pH 7.4; 110 mM KCl; 10Mm NaCl; 1 mM MgCl <sub>2</sub> ; 15 µM ZnCl <sub>2</sub> ; 0.02% Tween; 0.1 % p/v ultrapure BSA, 15% glycerol, pH 7.5 |

The purification buffers were prepared in DEPC water.
